# Supplementary material for: Regium bonds between Mn clusters (M = Cu, Ag, Au and n = 2–6) and nucleophiles NH3 and HCN
Source: Royal Society of Chemistry journal article supplement (doi:10.1039/c8cp03883j), 2018-01-01
Supplement: c8cp03883j1.pdf [file c8cp03883j1.pdf]

## SUPPLEMENTARY INFORMATION

### Regium Bonds between $M_n$ Clusters ( $M=Cu, Ag, Au$ and $n=2-6$ ) and Nucleophiles $NH_3$ and $HCN$

Wiktor Zierkiewicz,<sup>\*1</sup> Mariusz Michalczyk<sup>1</sup> and Steve Scheiner<sup>\*2</sup>

<sup>1</sup> Faculty of Chemistry, Wrocław University of Science and Technology, Wybrzeże  
Wyspiańskiego 27, 50-370 Wrocław, Poland

<sup>2</sup> Department of Chemistry and Biochemistry, Utah State University Logan, Utah 84322-0300,  
United States

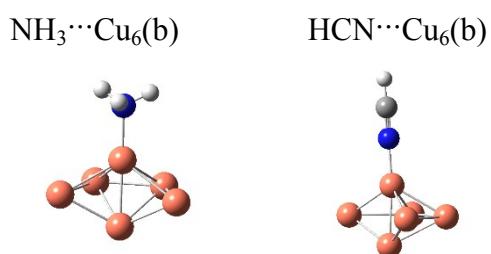

Fig S1. Optimized geometries of complexes of  $NH_3$  and  $HCN$  with the secondary MEP maximum of  $Cu_6$ .

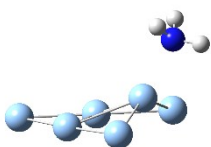

Fig S2. Optimized geometry of complex of  $NH_3$  with  $Ag_6$ .

TABLE S1. Comparison of geometric data and MEP maxima between two levels of theory: MP2 and DFT for open-shell isolated clusters.

|                        | MP2/aug-cc-pVDZ-PP |                 |                 | PBE0-D3(BJ)/def2-TVZPP |                 |                 |
|------------------------|--------------------|-----------------|-----------------|------------------------|-----------------|-----------------|
|                        | Cu <sub>3</sub>    | Ag <sub>3</sub> | Au <sub>3</sub> | Cu <sub>3</sub>        | Ag <sub>3</sub> | Au <sub>3</sub> |
| R1                     | 2.269              | 2.592           | 2.651           | 2.339                  | 2.640           | 2.605           |
| R2                     | 2.478              | 2.873           | 2.502           | 2.626                  | 3.033           | 2.878           |
| V <sub>s,max</sub> (a) | 44.1               | 38.3            | 32.2            | 40.9                   | 34.6            | 34.2            |
| V <sub>s,max</sub> (b) | 13.4               | 9.9             | -3.8            | 15.4                   | 13.0            | 9.7             |
|                        | Cu <sub>5</sub>    | Ag <sub>5</sub> | Au <sub>5</sub> | Cu <sub>5</sub>        | Ag <sub>5</sub> | Au <sub>5</sub> |
| R1                     | 2.328              | 2.646           | 2.593           | 2.417                  | 2.720           | 2.669           |
| R2                     | 2.400              | 2.723           | 2.626           | 2.463                  | 2.770           | 2.689           |
| R3                     | 2.321              | 2.636           | 2.548           | 2.399                  | 2.695           | 2.619           |
| R4                     | 2.333              | 2.683           | 2.674           | 2.429                  | 2.765           | 2.756           |
| V <sub>s,max</sub> (a) | 26.6               | 21.4            | 21.8            | 22.1                   | 19.2            | 19.3            |
| V <sub>s,max</sub> (b) | 13.3               | 13.0            | 10.0            | 15.4                   | 13.5            | 9.8             |

Table S2. MP2 calculated energy (kcal/mol) needed to distorted the indicated planar cluster to its nonplanar secondary minimum geometry.

|    | M <sub>5</sub> | M <sub>6</sub> |
|----|----------------|----------------|
| Cu | 1.31           | 1.05           |
| Ag | 4.76           | 8.08           |
| Au | 14.07          | 25.66          |

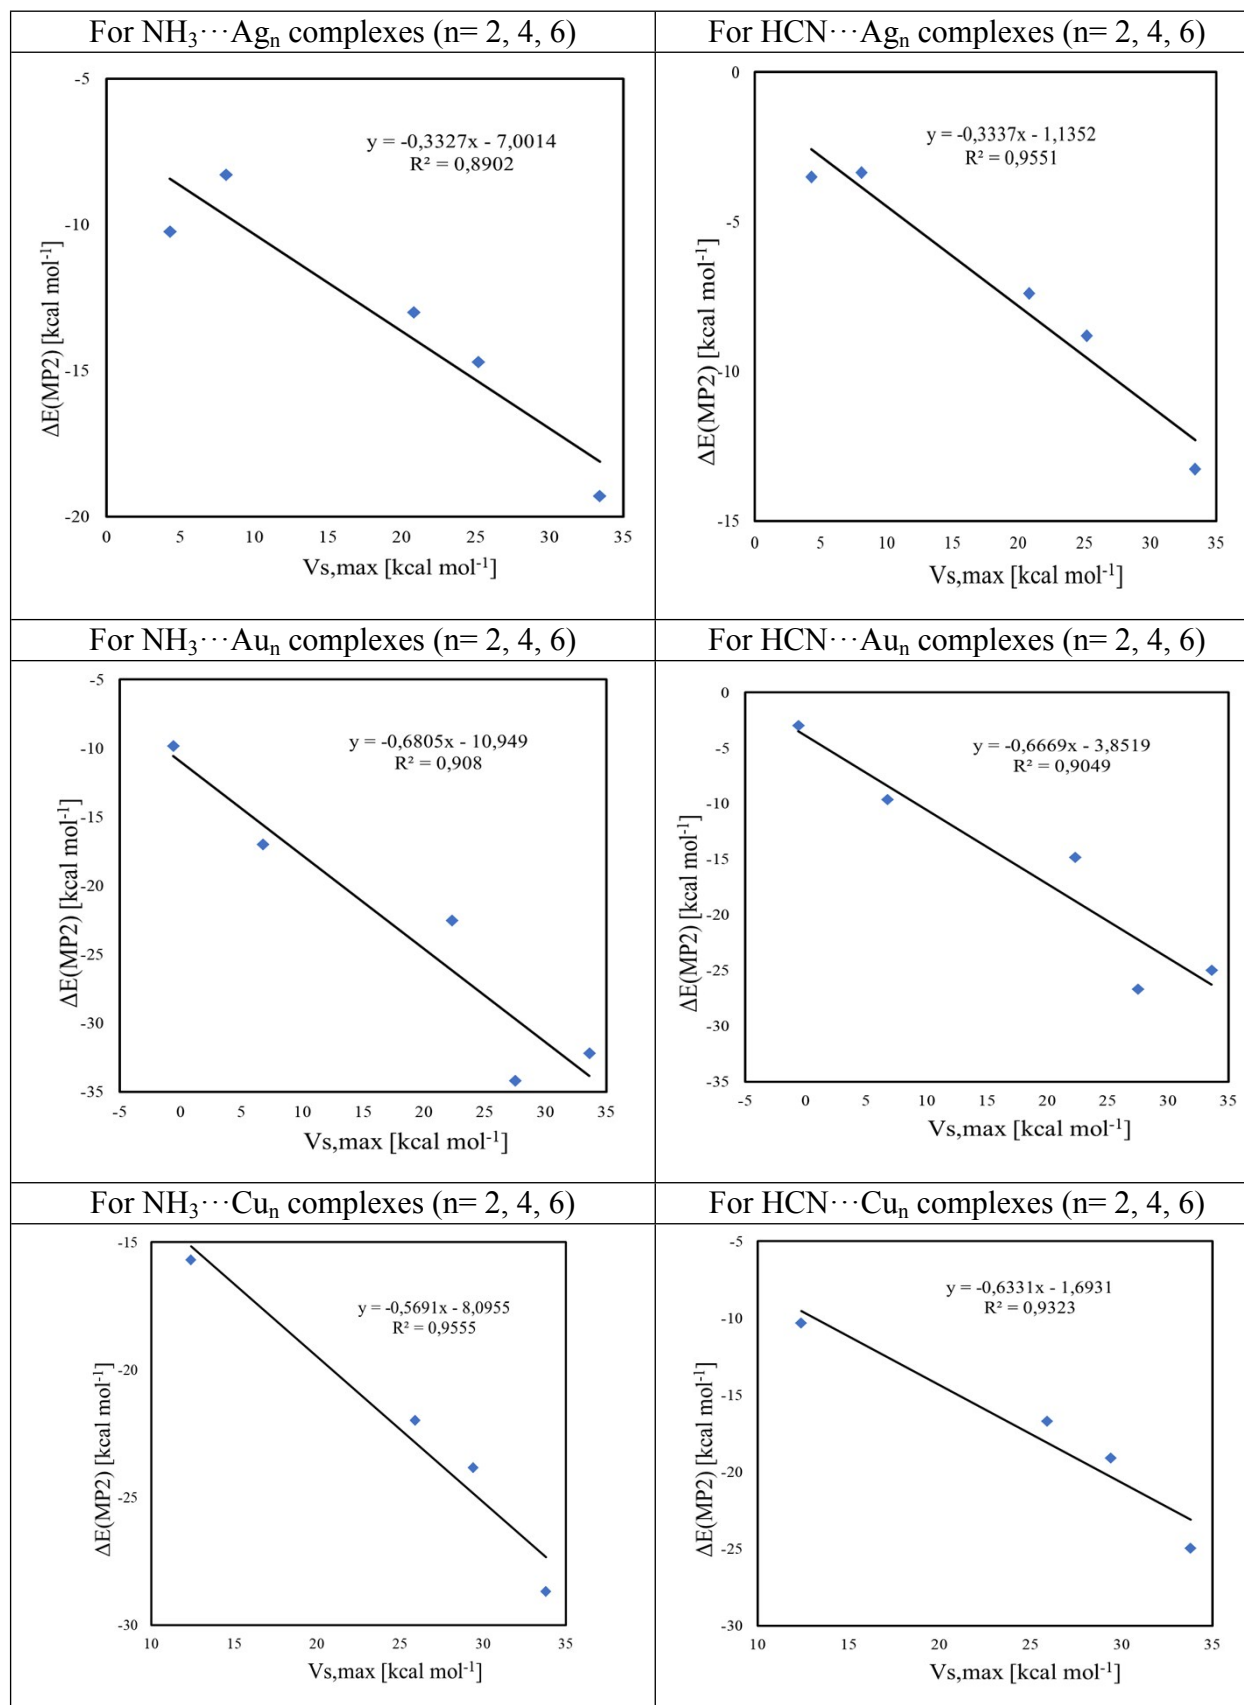

Fig. S3. Correlations between  $E_{\text{int}}$  and  $V_{s,\text{max}}$  for closed-shell Mn ( $n=2, 4, 6$ ) complexes.

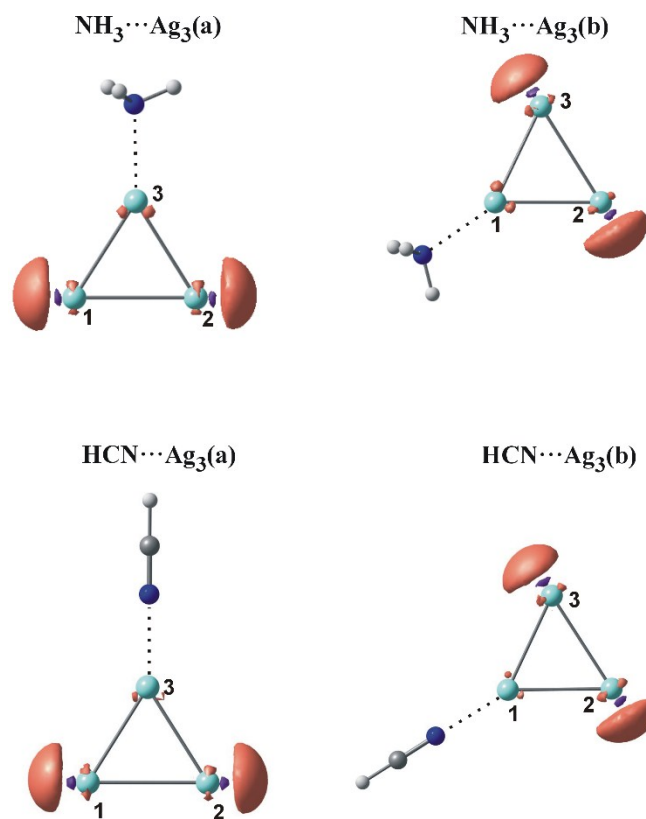

Fig. S4. DFT spin density isosurfaces ( $\pm 0.006$  a.u.) calculated in doublet states of  $\text{Ag}_3$  complexes. Orange color corresponds to positive values of spin density and purple color means negative values of it. Calculations performed at the PBE0-D3(BJ)/def2-TVZPP level of theory.

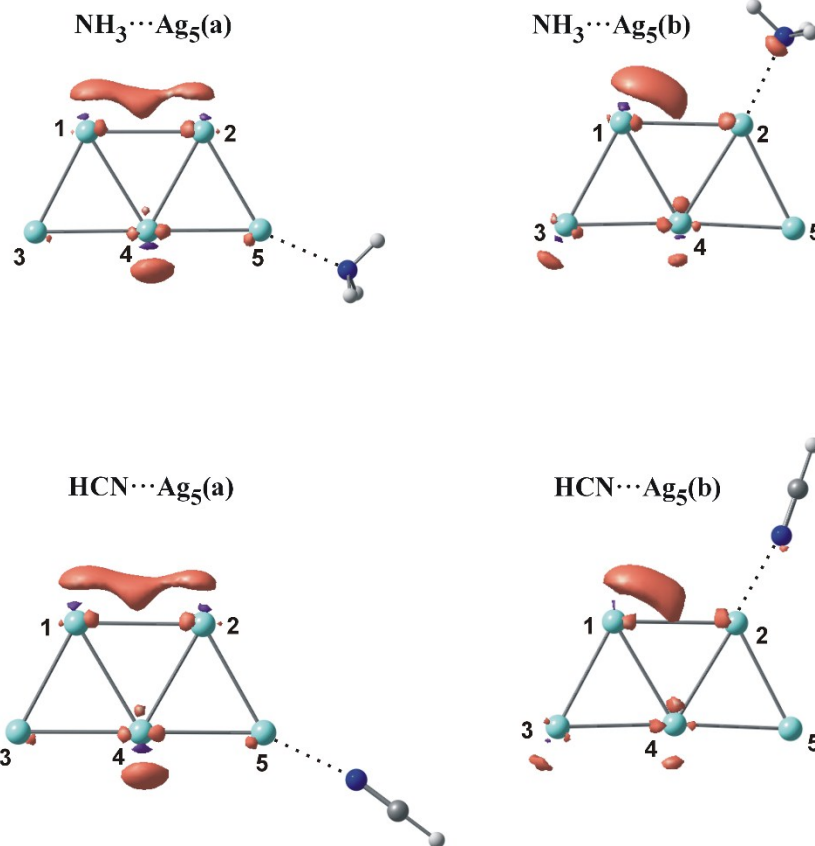

Fig. S5. DFT spin density isosurfaces ( $\pm 0.006$  a.u.) calculated in doublet states of Ag<sub>5</sub> complexes. Orange color corresponds to positive values of spin density and purple color refers to negative. Calculations performed at the PBE0-D3(BJ)/def2-TVZPP level of theory.

TABLE S3. EDA/PBE0-D3(BJ)/ZORA/TZ2P decomposition of the interaction energy of closed-shell  $Au_n$  and  $Cu_n$  complexes into Pauli repulsion ( $E_{\text{Pauli}}$ ), electrostatic ( $E_{\text{elstat}}$ ), orbital interaction ( $E_{\text{oi}}$ ) and dispersion ( $E_{\text{disp}}$ ) terms. All energies in  $\text{kcal mol}^{-1}$ . The relative values in percent express the contribution of each to the sum of all attractive energy terms.

| System                                     | $E_{\text{int}}$ | $E_{\text{Pauli}}$ | $E_{\text{elec}}$ | %  | $E_{\text{oi}}$ | %  | $E_{\text{disp}}$ | % |
|--------------------------------------------|------------------|--------------------|-------------------|----|-----------------|----|-------------------|---|
| $\text{NH}_3 \cdots \text{Au}_2(\text{a})$ | -28.27           | 99.22              | -90.82            | 71 | -35.32          | 28 | -1.35             | 1 |
| $\text{NH}_3 \cdots \text{Au}_4(\text{a})$ | -30.58           | 103.75             | -93.63            | 70 | -38.77          | 29 | -1.93             | 1 |
| $\text{NH}_3 \cdots \text{Au}_4(\text{b})$ | -15.65           | 112.20             | -90.38            | 71 | -35.80          | 28 | -1.66             | 1 |
| $\text{NH}_3 \cdots \text{Au}_6(\text{a})$ | -20.76           | 87.05              | -75.76            | 70 | -30.50          | 28 | -1.55             | 1 |
| $\text{NH}_3 \cdots \text{Au}_6(\text{b})$ | -11.80           | 72.83              | -57.08            | 67 | -25.05          | 30 | -2.50             | 3 |
|                                            |                  |                    |                   |    |                 |    |                   |   |
| $\text{NH}_3 \cdots \text{Cu}_2(\text{a})$ | -24.31           | 70.50              | -69.22            | 73 | -24.50          | 26 | -1.10             | 1 |
| $\text{NH}_3 \cdots \text{Cu}_4(\text{a})$ | -29.34           | 68.55              | -70.27            | 72 | -25.86          | 26 | -1.75             | 2 |
| $\text{NH}_3 \cdots \text{Cu}_4(\text{b})$ | -16.05           | 71.40              | -63.24            | 72 | -22.94          | 26 | -1.26             | 1 |
| $\text{NH}_3 \cdots \text{Cu}_6(\text{a})$ | -21.67           | 69.87              | -65.93            | 72 | -24.27          | 27 | -1.35             | 1 |
| $\text{NH}_3 \cdots \text{Cu}_6(\text{b})$ | -22.43           | 67.62              | -63.49            | 71 | -24.30          | 27 | -2.26             | 3 |

TABLE S4. Interaction energy ( $E_{\text{int}}$ ) corrected for BSSE, cluster deformation energy ( $E_{\text{def}}$ ), and intermolecular geometrical parameters (energies in kcal/mol, distances in Å, angles in degrees) in open-shell regium bonded  $M_n$  ( $M = \text{Cu}, \text{Ag}, \text{Au}$  and  $n = 3, 5$ ) complexes with  $\text{NH}_3$  and  $\text{HCN}$ .

Data obtained at the PBE0-D3(BJ)/def2-TVZPP level of theory.

| System                                   | $E_{\text{int}}$ | R(N $\cdots$ M) | System                                  | $E_{\text{int}}$ | R(N $\cdots$ M) | $\theta(\text{M}\cdots\text{N}-\text{C})$ |
|------------------------------------------|------------------|-----------------|-----------------------------------------|------------------|-----------------|-------------------------------------------|
| $\text{NH}_3\cdots\text{Cu}_3(\text{a})$ | -28.13           | 2.000           | $\text{HCN}\cdots\text{Cu}_3(\text{a})$ | -24.01           | 1.880           | 180.0                                     |
| $\text{NH}_3\cdots\text{Cu}_3(\text{b})$ | -28.12           | 2.000           | $\text{HCN}\cdots\text{Cu}_3(\text{b})$ | -24.01           | 1.880           | 180.0                                     |
| $\text{NH}_3\cdots\text{Ag}_3(\text{a})$ | -19.85           | 2.261           | $\text{HCN}\cdots\text{Ag}_3(\text{a})$ | -13.57           | 2.189           | 178.4                                     |
| $\text{NH}_3\cdots\text{Ag}_3(\text{b})$ | -19.85           | 2.263           | $\text{HCN}\cdots\text{Ag}_3(\text{b})$ | -13.57           | 2.191           | 179.8                                     |
| $\text{NH}_3\cdots\text{Au}_3(\text{a})$ | -32.02           | 2.142           | $\text{HCN}\cdots\text{Au}_3(\text{a})$ | -25.19           | 2.017           | 179.9                                     |
| $\text{NH}_3\cdots\text{Au}_3(\text{b})$ | -31.85           | 2.142           | $\text{HCN}\cdots\text{Au}_3(\text{b})$ | -25.19           | 2.017           | 179.9                                     |
|                                          |                  |                 |                                         |                  |                 |                                           |
| $\text{NH}_3\cdots\text{Cu}_5(\text{a})$ | -20.29           | 2.040           | $\text{HCN}\cdots\text{Cu}_5(\text{a})$ | -14.84           | 1.931           | 176.7                                     |
| $\text{NH}_3\cdots\text{Cu}_5(\text{b})$ | -19.81           | 2.040           | $\text{HCN}\cdots\text{Cu}_5(\text{b})$ | -14.78           | 1.921           | 176.7                                     |
| $\text{NH}_3\cdots\text{Cu}_5(\text{c})$ | -19.16           | 2.057           | $\text{HCN}\cdots\text{Cu}_5(\text{c})$ | -13.89           | 1.929           | 177.9                                     |
| $\text{NH}_3\cdots\text{Ag}_5(\text{a})$ | -13.71           | 2.317           | $\text{HCN}\cdots\text{Ag}_5(\text{a})$ | -7.33            | 2.297           | 170.2                                     |
| $\text{NH}_3\cdots\text{Ag}_5(\text{b})$ | -13.57           | 2.309           | $\text{HCN}\cdots\text{Ag}_5(\text{b})$ | -7.09            | 2.282           | 171.7                                     |
| $\text{NH}_3\cdots\text{Ag}_5(\text{c})$ | -11.84           | 2.330           | $\text{HCN}\cdots\text{Ag}_5(\text{c})$ | -5.82            | 2.338           | 171.4                                     |
| $\text{NH}_3\cdots\text{Au}_5(\text{a})$ | -21.64           | 2.208           | $\text{HCN}\cdots\text{Au}_5(\text{a})$ | -13.92           | 2.099           | 176.7                                     |
| $\text{NH}_3\cdots\text{Au}_5(\text{b})$ | -21.83           | 2.191           | $\text{HCN}\cdots\text{Au}_5(\text{b})$ | -13.68           | 2.080           | 175.8                                     |
| $\text{NH}_3\cdots\text{Au}_5(\text{c})$ | -17.67           | 2.217           | $\text{HCN}\cdots\text{Au}_5(\text{c})$ | -8.56            | 2.152           | 180.0                                     |

Table S5. DFT atomic spin densities [ $\Delta\rho$ , in e] on atoms in  $M_3$  complexes. Data obtained at the PBE0-D3(BJ)/def2-TVZPP level of theory.

| Atom | $\text{NH}_3\cdots M_3(\text{a})$ |                       |                       | $\text{NH}_3\cdots M_3(\text{b})$ |                       |                       |
|------|-----------------------------------|-----------------------|-----------------------|-----------------------------------|-----------------------|-----------------------|
|      | <b>Cu<sub>3</sub></b>             | <b>Ag<sub>3</sub></b> | <b>Au<sub>3</sub></b> | <b>Cu<sub>3</sub></b>             | <b>Ag<sub>3</sub></b> | <b>Au<sub>3</sub></b> |
| 1    | 0.50                              | 0.51                  | 0.00                  | 0.00                              | 0.00                  | 0.57                  |
| 2    | 0.50                              | 0.49                  | 0.50                  | 0.50                              | 0.52                  | 0.43                  |
| 3    | 0.00                              | 0.00                  | 0.50                  | 0.50                              | 0.48                  | 0.00                  |
| Atom | $\text{HCN}\cdots M_3(\text{a})$  |                       |                       | $\text{HCN}\cdots M_3(\text{b})$  |                       |                       |
|      | <b>Cu<sub>3</sub></b>             | <b>Ag<sub>3</sub></b> | <b>Au<sub>3</sub></b> | <b>Cu<sub>3</sub></b>             | <b>Ag<sub>3</sub></b> | <b>Au<sub>3</sub></b> |
| 1    | 0.47                              | 0.48                  | -0.02                 | 0.00                              | -0.01                 | 0.50                  |
| 2    | 0.47                              | 0.50                  | 0.50                  | 0.47                              | 0.49                  | 0.49                  |
| 3    | 0.00                              | -0.01                 | 0.50                  | 0.47                              | 0.49                  | -0.02                 |

Table S6. DFT atomic spin densities [ $\Delta\rho$ , in e] on atoms in  $M_5$  complexes. Data obtained at the PBE0-D3(BJ)/def2-TVZPP level of theory.

|      | NH <sub>3</sub> ···M <sub>5</sub> (a) |                 |                 | NH <sub>3</sub> ···M <sub>5</sub> (b) |                 |                 | NH <sub>3</sub> ···M <sub>5</sub> (c) |                 |                 |
|------|---------------------------------------|-----------------|-----------------|---------------------------------------|-----------------|-----------------|---------------------------------------|-----------------|-----------------|
| Atom | Cu <sub>5</sub>                       | Ag <sub>5</sub> | Cu <sub>5</sub> | Cu <sub>5</sub>                       | Ag <sub>5</sub> | Cu <sub>5</sub> | Cu <sub>5</sub>                       | Ag <sub>5</sub> | Au <sub>5</sub> |
| 1    | 0.34                                  | 0.33            | 0.31            | 0.29                                  | 0.31            | 0.36            | 0.17                                  | 0.17            | 0.10            |
| 2    | 0.19                                  | 0.20            | 0.23            | 0.16                                  | 0.16            | 0.12            | 0.17                                  | 0.17            | 0.10            |
| 3    | 0.09                                  | 0.10            | 0.07            | 0.35                                  | 0.33            | 0.36            | 0.30                                  | 0.30            | 0.34            |
| 4    | 0.25                                  | 0.24            | 0.28            | 0.09                                  | 0.09            | 0.08            | 0.05                                  | 0.04            | 0.08            |
| 5    | 0.11                                  | 0.11            | 0.09            | 0.09                                  | 0.09            | 0.04            | 0.30                                  | 0.31            | 0.34            |
|      | HCN···M <sub>5</sub> (a)              |                 |                 | HCN···M <sub>5</sub> (b)              |                 |                 | HCN···M <sub>5</sub> (c)              |                 |                 |
| Atom | Cu <sub>5</sub>                       | Ag <sub>5</sub> | Cu <sub>5</sub> | Cu <sub>5</sub>                       | Ag <sub>5</sub> | Cu <sub>5</sub> | Cu <sub>5</sub>                       | Ag <sub>5</sub> | Au <sub>5</sub> |
| 1    | 0.33                                  | 0.33            | 0.30            | 0.26                                  | 0.29            | 0.33            | 0.18                                  | 0.19            | 0.12            |
| 2    | 0.20                                  | 0.21            | 0.24            | 0.15                                  | 0.17            | 0.12            | 0.18                                  | 0.19            | 0.12            |
| 3    | 0.09                                  | 0.10            | 0.07            | 0.37                                  | 0.32            | 0.38            | 0.28                                  | 0.27            | 0.34            |
| 4    | 0.26                                  | 0.23            | 0.28            | 0.08                                  | 0.09            | 0.08            | 0.04                                  | 0.06            | 0.06            |
| 5    | 0.10                                  | 0.11            | 0.09            | 0.09                                  | 0.10            | 0.05            | 0.29                                  | 0.27            | 0.34            |

TABLE S7. EDA/PBE0-D3(BJ)/ZORA/TZ2P decomposition of the interaction energy of open-shell Au<sub>n</sub> and Cu<sub>n</sub> complexes into Pauli repulsion ( $E_{\text{Pauli}}$ ), electrostatic ( $E_{\text{elstat}}$ ), orbital interaction ( $E_{\text{oi}}$ ) and dispersion ( $E_{\text{disp}}$ ) terms. All energies in kcal mol<sup>-1</sup>. The relative values in percent express the contribution of each to the sum of all attractive energy terms.

| System                                 | $E_{\text{int}}$ | $E_{\text{Pauli}}$ | $E_{\text{elec}}$ | %  | $E_{\text{oi}}$ | %  | $E_{\text{disp}}$ | % |
|----------------------------------------|------------------|--------------------|-------------------|----|-----------------|----|-------------------|---|
| NH <sub>3</sub> ···Au <sub>3</sub> (a) | -31.62           | 101.68             | -93.75            | 70 | -37.99          | 28 | -1.56             | 1 |
| NH <sub>3</sub> ···Au <sub>3</sub> (b) | -31.48           | 107.38             | -95.26            | 69 | -42.03          | 30 | -1.57             | 1 |
| NH <sub>3</sub> ···Au <sub>5</sub> (a) | -20.96           | 98.39              | -80.80            | 68 | -36.99          | 31 | -1.56             | 1 |
| NH <sub>3</sub> ···Au <sub>5</sub> (b) | -21.46           | 114.85             | -86.65            | 64 | -47.69          | 35 | -1.97             | 1 |
|                                        |                  |                    |                   |    |                 |    |                   |   |
| NH <sub>3</sub> ···Cu <sub>3</sub> (a) | -30.29           | 68.78              | -71.53            | 72 | -26.18          | 26 | -1.36             | 1 |
| NH <sub>3</sub> ···Cu <sub>3</sub> (b) | -30.29           | 68.79              | -71.54            | 72 | -26.18          | 26 | -1.36             | 1 |
| NH <sub>3</sub> ···Cu <sub>5</sub> (a) | -21.75           | 79.29              | -69.18            | 68 | -30.51          | 30 | -1.34             | 1 |
| NH <sub>3</sub> ···Cu <sub>5</sub> (b) | -21.74           | 85.86              | -70.38            | 65 | -35.50          | 33 | -1.71             | 2 |



TABLE S8. NBO values of E(2) for LP(N) $\rightarrow\sigma^*(\text{Ag-Ag})$  orbital interaction (kcal/mol) and charge transfer from Lewis base to  $\text{M}_n$  clusters (CT, me) in open-shell  $\text{Ag}_n$  complexes obtained at PBE0-D3(BJ)/def2-TVZPP level.

| System                                   | LP(N) $\rightarrow\sigma^*\text{Ag-Ag}$<br>[kcal/mol] | CT <sup>a</sup><br>[me] |
|------------------------------------------|-------------------------------------------------------|-------------------------|
| $\text{NH}_3\cdots\text{Ag}_3(\text{a})$ | 14.11 (14.94) <sup>b</sup>                            | 36                      |
| $\text{NH}_3\cdots\text{Ag}_3(\text{b})$ | 14.14 (14.90) <sup>b</sup>                            | 36                      |
| $\text{NH}_3\cdots\text{Ag}_5(\text{a})$ | 22.07                                                 | 36                      |
| $\text{NH}_3\cdots\text{Ag}_5(\text{b})$ | 20.69                                                 | 41                      |
| $\text{NH}_3\cdots\text{Ag}_5(\text{c})$ | 10.14                                                 | 39                      |
|                                          |                                                       |                         |
| $\text{HCN}\cdots\text{Ag}_3(\text{a})$  | 12.26 (12.63) <sup>b</sup>                            | 15                      |
| $\text{HCN}\cdots\text{Ag}_3(\text{b})$  | 12.15 (12.58) <sup>b</sup>                            | 15                      |
| $\text{HCN}\cdots\text{Ag}_5(\text{a})$  | 16.56                                                 | 14                      |
| $\text{HCN}\cdots\text{Ag}_5(\text{b})$  | 16.05                                                 | 17                      |
| $\text{HCN}\cdots\text{Ag}_5(\text{c})$  | 6.89                                                  | 10                      |

<sup>a</sup> Charge transfer from Lewis base to the metal cluster.

<sup>b</sup>LP(N) $\rightarrow$ LP(Ag) .

Table S9. DFT atomic spin densities ( $\Delta\rho, e$ ) on atoms in isolated  $\text{M}_7$  as well as its complexes. Data obtained at the PBE0-D3(BJ)/def2-TVZPP level of theory.

| Atom | isolated | $\text{NH}_3\cdots\text{Ag}_7(\text{a})$ | $\text{NH}_3\cdots\text{Ag}_7(\text{b})$ |
|------|----------|------------------------------------------|------------------------------------------|
| 1    | 0.00     | 0.01                                     | 0.01                                     |
| 2    | 0.00     | 0.00                                     | 0.01                                     |
| 3    | 0.00     | 0.00                                     | 0.01                                     |
| 4    | 0.00     | 0.00                                     | 0.01                                     |
| 5    | 0.00     | 0.00                                     | 0.01                                     |
| 6    | 0.50     | 0.49                                     | 0.33                                     |
| 7    | 0.50     | 0.50                                     | 0.60                                     |

Table S10. Secondary minima for dimers of NH<sub>3</sub> with Ag<sub>n</sub> clusters. Data obtained at the PBE0-D3(BJ)/def2-TVZPP level of theory. E<sub>int</sub> corrected for BSSE (in kcal/mol). Distances are in Å.

| System                                 | E <sub>int</sub> | R(N...M) | structure                                                                            |
|----------------------------------------|------------------|----------|--------------------------------------------------------------------------------------|
| NH <sub>3</sub> ...Ag <sub>2</sub>     | -                | -        | -                                                                                    |
| NH <sub>3</sub> ...Ag <sub>3</sub>     | -                | -        | -                                                                                    |
| NH <sub>3</sub> ...Ag <sub>4</sub> (c) | -2.65            | 3.031    | 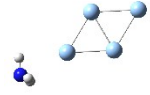   |
| NH <sub>3</sub> ...Ag <sub>5</sub> (d) | -4.66            | 2.785    |    |
| NH <sub>3</sub> ...Ag <sub>5</sub> (e) | -4.67            | 2.792    |    |
| NH <sub>3</sub> ...Ag <sub>5</sub> (f) | -3.59            | 3.027    |    |
| NH <sub>3</sub> ...Ag <sub>5</sub> (g) | -3.92            | 3.204    |   |
| NH <sub>3</sub> ...Ag <sub>6</sub> (c) | -4.70            | 2.788    |  |
| NH <sub>3</sub> ...Ag <sub>6</sub> (d) | -3.49            | 3.065    |  |
| NH <sub>3</sub> ...Ag <sub>6</sub> (e) | -4.16            | 3.665    |  |

Table S11. Secondary minima for dimers of HCN with  $\text{Ag}_n$  clusters. Data obtained at the PBE0-D3(BJ)/def2-TVZPP level of theory.  $E_{\text{int}}$  corrected for BSSE (in kcal/mol). Distances are in Å.

| System                                  | $E_{\text{int}}$ | structure                                                                            |
|-----------------------------------------|------------------|--------------------------------------------------------------------------------------|
| $\text{HCN}\cdots\text{Ag}_2(\text{c})$ | -3.04            | 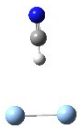    |
| $\text{HCN}\cdots\text{Ag}_3(\text{c})$ | -27.55           |     |
| $\text{HCN}\cdots\text{Ag}_3(\text{d})$ | -3.21            |     |
| $\text{HCN}\cdots\text{Ag}_4(\text{c})$ | -3.99            |    |
| $\text{HCN}\cdots\text{Ag}_4(\text{d})$ | -10.86           |  |
| $\text{HCN}\cdots\text{Ag}_5(\text{d})$ | -4.61            |  |
| $\text{HCN}\cdots\text{Ag}_5(\text{e})$ | -35.06           |   |
| $\text{HCN}\cdots\text{Ag}_6(\text{c})$ | -5.09            |  |
